# Supplementary material
Source: PubMed Central journal article supplement (PMC1895940)
Supplement: pnas_0701111104_2.pdf [file pnas_0701111104_2.pdf]

## B.

### I. *T. brucei* Prozyme

cgctattattagaacagtttctctatattg

aggggaggcaaaactggttttacaccagagggaaacggtaaggatg

**M** S V T R I

aaccagcaaaccgagtgcccaagttcgggtgcatgaccttgtgcatggtgggaggttgc  
N Q Q T E C P S S V H D L V S C W G G C  
accaatctaaaacctccacggacagcggcctggagaagcggtttgaactcaatttcgca  
T Q S K T S T D S G L E K R F E L N F A  
cagcctgttgatataaggaaccggttacggtaaaacagctggcatccgtgatggagcgtgcc  
Q P V D I G T V T V K Q L A S V M E R A  
ggtagctcacttcgctcagaactccgctgagctgggaattcatacgcttaagttcgacagg  
G E S L R Q N S A E L G I H T L K F D R  
tcctcttgggtgtttacggcaaagcagattgttgtgctcttccgtttcagtgatgcta  
S L L V F T A K Q I V V R S S V S V M L  
cacgaagcgggtacaccgatgcttgagctcatgctcaccacaacattattgtggattgg  
H E A V H P M L E L M R S H N I I V D W  
gcgtctttcatgccccggtcaactacggctcgccttgggacatgacatcggaaacgagtgat  
A S F M R V N Y G S P W D M T S E T S D  
attatggctcatgaatacgcgagttgaagtcggcgttcccaacggggccaccggtaccta  
I M A H E Y A E L K S A F P T G H P Y L  
gctggctcctgttgaccgtgatcactgcttttactttgtgtacgatggcatcgatcgcgac  
A G P V D R D H C F Y F V Y D G I D R D  
ccgtccagttgtcgaagggaaaatgatgtgcagatcaatgtttacatgtacaacgtacaa  
P S S C R R E N D V Q I N V Y M Y N V Q  
gcagatgatgagatgacttgnacggaaacaccaaagaacagcaacttcttgtatccac  
A D D E Y D L X G N T K E Q Q L L V S H  
tgccggggggagtagcgaacggttgcgagtgctcgacatattgggtccacgcaccccttggcc  
C A G E Y E T L R V S T Y G S T H P F A  
tccttcgaaacgaacgcggtgtctgccgagtgatatacaaaaaattgtgaatggactt  
S F E T N A V S A A S D I T K I V N G L  
ctcaaaaaattttaccggagagagttctgctcgtgctgctgcaggaccgggacgcacag  
L K K F Y P E R V L L V L L Q D R D A Q  
ggcacaactgctgctggcggttatggatagattggaaggtttaccgctcgtgcaccgcggt  
G T T A C G V M D R L E G F T V V H R G  
gctaatactttgggtggaggctatgtcttccaccaggccacatacgcacgcagtgcc**tga**  
A N H F G G G Y V F H Q A T Y A R S A -  
tttccagtagatgctgaaacgcttctgaaggttttttttttaaatgg

### II. *T. brucei* AdoMetDC

tcgctattattagaacagtttctgtactatattg

tttgtacgcgtatcctcagacacaaa

aagtacattgtttgggtgagcttgcaactcttaggaagcgcaccattcctttgtgggctgc

gtgtgtgctgctggtttggttatttaaatccgtaaggtgctatatttgaccgcacactg

actgaagtactagtc**atg**tccctcttgcaaggactctctttcgtcatggcgatgtggggt

**M** S S C K D S L S L M A M W G

tccatcgctcgttttgacccaaagcagcagcgaagtttcgaagggcctgagaagcgttg  
S I A R F D P K H E R S F E G P E K R L  
gaggtgataatgccccgggtggtagcgggacgcaggttagtggtttacttgcacacgatgac  
E V I M R V V D G T H V S G L L A H D D

gatgtgtggcaaaaagttattgatgctatatgtgcacacattgtttctcgtgagtttaat  
D V W Q K V I D A I C A H I V S R E F N  
gaatacattcgtcctacgtgttatcggagagctcattgtttgtaatgaaagatcgcggtg  
E Y I R S Y V L S E S S L F V M K D R V  
attctcataacttgtggtaccatcactcttttgaattgctggtccgctcatttgcgaggcg  
I L I T C G T I T L L N C V P L I C E A  
gtgagtactgtttgctggcgaagtagaatgggtttccttcatgcacaaaaactacagtttc  
V S T V C G E V E W V S F M H K N Y S F  
ccgtgggagcagaagggaccgcatctttcgtatggcggaagaatttaagacacttaggtcc  
P W E Q K G P H L S M A E E F K T L R S  
cattttccgctcgggacaaccattcatatttgggtccgattgacagcgaccactacttcttg  
H F P S G Q P F I F G P I D S D H Y F L  
tatttccacagtgtttgttcaaccagctgcagtgcagatgcacaactcagcatgacc  
Y F H S D V V Q P S C S D D A Q L S M T  
atgtatgggcttgatcgcaatcaaacgaaacactgggtactcggataagatggtgcctacg  
M Y G L D R N Q T K H W Y S D K M L P T  
ggtcctgaaaccgcagtgatacgggaggcaacggggctcagtgaaagttgtagatgattca  
G P E T A V I R E A T G L S E V V D D S  
tggattcttcacgaccttcagtatgagccatgtggctacagcataaatgcgatacgtggt  
W I L H D L Q Y E P C G Y S I N A I R G  
agcgagtatcaaacgatacacataaacacctgaggagcactgttcgtttgcattcttatgag  
S E Y Q T I H I T P E E H C S F A S Y E  
acgaatacgtgtgctcttaattactcgaagtgtatctgtggagtattgagagtgttcgac  
T N T C A L N Y S K C I C G V L R V F D  
cctgaacgggttttctgtgattgtatttattgaccctgatagtgtgtgtgggaagtcttac  
P E R F S V I V F I D P D S A V G K S Y  
catagtgggggaacgattggtgtggaacccgagtattatccgaaactatgaagcgcacac  
H S G G T I G V E P E Y Y P N Y E A H H  
cgtacagtgaacgagtatacaccgggtcactgggttctgaaggtaaaactatgtaaaacgt  
R T V N E Y T P G H W V L K V N Y V K R  
gcggttggcactgtagggacttccgcagcttctggagcgaaggaa**tga**acggagcagccc  
A V G T V G T S A A S G A K E -  
tgtgcttttgggttgggttcttcttgcgaagttagtcttcatatgctgcaggcagattttcc
