# Supplementary material
Source: PubMed Central journal article supplement (PMC1895940)
Supplement: pnas_0701111104_8.pdf [file pnas_0701111104_8.pdf]

|                  |              |                     |                        |                      |                      |                                     |                                       |                 |
|------------------|--------------|---------------------|------------------------|----------------------|----------------------|-------------------------------------|---------------------------------------|-----------------|
|                  |              | 223                 | 229                    |                      |                      |                                     |                                       |                 |
| Human            | QFY-----     | -----MKDGV          | TAKADVTRESGIRD         | LIPG-----SVIDATM     | NPCGYSMNG-----       | MKSD                                | 236                                   |                 |
| Drosophila       | IFY-----     | -----KNKFN          | DANGATVKSGIDT          | ILPT-----MHIDDFL     | FDPCGYSMNG-----      | INDK                                | 244                                   |                 |
| C.elegans        | KFT-----     | -----KDYAV          | DGNDCFMRA              | IDKIIPA-----GADVHDEL | FDPCGYSMNA           | Y-----                              | MNDT 254                              |                 |
| Neurospora       | KFYLEEAT---- | -----AIAKE          | KLFKSEANGDAS           | FDVFS                | SSGDCDADGQAILPEAL    | TTEGHALGTVVSEACGLSAVYPTSTYP-----    | D-ARIDAYQFSPCGFSANGVVPVAGADGTIPKS 378 |                 |
| Yeast            | KF-----      | -----VCGPEAS        | -----                  | TTALVPE              | NEDKGNLGYQMTKNTRLDEI | YVNSAQDSD--LS-FHHDAFAFTPCGYSSN----- | MILAE 294                             |                 |
| Dictyostelium    | QFF-----     | -----KREGV          | SAWDTTVNSGIADLLPG----- | SMIDDFQ              | FDPCGYSMNG-----      | LLN                                 | 266                                   |                 |
| Arabidopsis      | VFY-----     | -----KDEAD          | KTGSMTDNSGIRKILPK----- | SEICDFE              | FEPCGYSMNS-----      | IEG                                 | 239                                   |                 |
| Potato           | VFY-----     | -----KTEESA         | AHMTVRS                | GIRKILPK-----SEICDFE | FEPCGYSMNS-----      | IEG                                 | 242                                   |                 |
| T.brucei         | HWYS-----    | -----DKMLP          | TGPETAVIREATGLSEV      | VDDS-----WILHDLQ     | VEPCGYSINA-----      | IRG                                 | 255                                   |                 |
| T.cruzi          | HWFS-----    | -----DRFI           | STGTETAAIRKATKLDKV     | ADDS-----WKLHDLQ     | VEPCGYSINT-----      | IRG                                 | 256                                   |                 |
| L.major          | YWFR-----    | -----DRFI           | STSAETAIRAATHLDRV      | VDDGT-----WTLHDLQ    | VEPCGYSINA-----      | IRD                                 | 260                                   |                 |
| T.brucei prozyme | -----        | -----VQADDE         | YDLGNTKEQQLLV          | SHC-----             | -----                | A                                   | 228                                   |                 |
| T.cruzi prozyme  | -----        | -----VKT            | DGSGDDDDALKSVQ         | VVPLS-----           | -----                | E                                   | 229                                   |                 |
| L.major prozyme  | -----        | -----VAAG           | -----                  | LEE                  | VNKTQRFHALQ-----     | S                                   | 203                                   |                 |
| P.falciparum     | CCHNNNYS     | SGSCHNIVSVVPSERNNDH | VHRRHYEDTLNRSNISAEDNNR | NAQLEKEKED           | VRRDDEENK            | VLIKMDIDT                           | NLYECINYNKESFLYNEFYFTPCGYS            | CNVS-----EK 427 |

|                  |                |                      |                 |                              |                     |                 |            |           |          |          |                      |                |             |              |              |        |            |            |            |     |      |             |
|------------------|----------------|----------------------|-----------------|------------------------------|---------------------|-----------------|------------|-----------|----------|----------|----------------------|----------------|-------------|--------------|--------------|--------|------------|------------|------------|-----|------|-------------|
|                  | 243            | 247                  | 256             |                              |                     |                 |            |           |          |          |                      |                |             |              |              |        |            |            |            |     |      |             |
| Human            | GTYYTITITPEP-  | EFSYVSFETNLSQT-----  | SYDDLIRKVV      | EVFKPKGFVTT--LFVNQSS-----    | KCRTVLAS            | PQKIEG---       | FKRLDCQS   | AMFN      | YNFVFTS  | FAKKQQQ  | 331                  |                |             |              |              |        |            |            |            |     |      |             |
| Drosophila       | GEYMTITITPEN-  | QFSYVSFETNVALS-----  | NYRKLINQV       | INTFKPKGFI                   | VT--IFANKCS-----    | LAYETMKE        | LEVEYSQGS  | HWKRTDM   | QCCNFP   | SYNLLFAQ | YSHSEKT 343          |                |             |              |              |        |            |            |            |     |      |             |
| C.elegans        | DQYATITITPEK-  | AFSFASFETNQDLV-----  | CLYSQTRK        | VLQCFRPNKILMT--VFANDISE----- | RGKDAQ              | QQLWDRELPG--    | YRRTNV     | QFVRLE    | TETLVY   | AHFV     | RKAST 352            |                |             |              |              |        |            |            |            |     |      |             |
| Neurospora       | GHYFTITITPEP-  | QCSFASFETNVPG--      | QNGRQTA         | EIVQVNI                      | FRPGRFSVT--LFEAK    | GALATTPGED      | ADDSRR     | SWGAA     | AQRMER   | INGYRR   | VDRIVHDFEDYDLVFRY    | YEREDWV 492    |             |              |              |        |            |            |            |     |      |             |
| Yeast            | KYYTITITPEK-   | GWSYASFESNIPV        | DISQGGKQDNL     | DVLLHILNVFQ                  | PREFSMT--FFTKN----- | YQNQSF          | QKLLSIN--- | ESLPD     | YIKL     | DKIVYD   | LDYHLFYMKLQKKI-- 396 |                |             |              |              |        |            |            |            |     |      |             |
| Dictyostelium    | EFYWTITITPES-  | HCSYVSFDTNVALA-----  | DYNQLLAK        | VLNVFKPGRFTA--LYA            | EDGAPCGDPY          | TAFDVNVPSYAIQNK | TVHGF      | DGGYD     | VVVS     | NYQQLDK  | KVNF                 | SNDLLIQSIE 376 |             |              |              |        |            |            |            |     |      |             |
| Arabidopsis      | DAISTITITPED-  | GFSYASF              | EAVGDFN---TLDLS | QLVTRVLS                     | CFEPKQFSVA--VHSS    | VGANSYKPEIT     | VDLEDY     | GCRERT    | FESL     | GEE--SGT | VMYQTFEKL            | KGKYGSPRSTL    | KCEWS 351   |              |              |        |            |            |            |     |      |             |
| Potato           | AAVSTITITPED-  | GFTYASF              | ESVGNPK---TME   | LGPLVERVLAC                  | FEPAEFSVA--LHAD     | VATKLLERIC      | SDVVKYSLA  | EWSPEE    | FGE--GGS | IVYQ     | FTRT-PY              | CESPKSVL       | KGCKW 352   |              |              |        |            |            |            |     |      |             |
| T.brucei         | SEYQITITITPEE- | HCSFASYETNTCALN----- | YSKICG          | VLRFVDP                      | PERFSVI--VFIDPD     | SAVG-----       | KSYHSGGT   | IGVE      | PEYYP    | NEAH     | RTVNEYTPGH           | WLVK           | VNVKRAV 357 |              |              |        |            |            |            |     |      |             |
| T.cruzi          | AEYQITITITPED- | HCSFASYETNTPAVN----- | YSERINT         | VLGVFAP                      | IRFSVI--VFIDPD      | SDVG-----       | RLYQK      | QNVG      | VEAY     | PKYEL    | QNR                  | TVNEFAP        | GPVVMK      | MNYARRAE 358 |              |        |            |            |            |     |      |             |
| L.major          | EEYQTMITITPED- | HCSFASYETNSRATN----- | YSDRM           | KVLGV                        | FRPQRTVI--VFLD      | PSPVG-----      | KAYNE      | GKIG      | VEPE     | YYP      | PEYSL                | LHRT           | TNEFAP      | GVAMK        | INYVRTAA 362 |        |            |            |            |     |      |             |
| T.brucei prozyme | GEYETL         | SVSTYGS              | THPFASFETNA     | VSAAS---DIT                  | KIVNGLL             | KKFYPER         | VLV--LLQ   | DRD-----  | AQGT     | TACG     | VMDR                 | LEGFT          | VVHR        | GANHF        | GGGYV        | FHQATY | ARSA-- 325 |            |            |     |      |             |
| T.cruzi prozyme  | TEYEML         | RVSTDN               | MAHPFAAFETNS    | MIAAT---KK                   | REL                 | VRGLLEK         | FCPDR      | FTMV--VLQ | DRC----- | SPLAQ    | KGSIF                | DEME           | GYT         | IMNR         | ATNH         | FGQY   | AHQTSY     | IRAE-- 326 |            |     |      |             |
| L.major prozyme  | GEYEVMT        | TFAG---VPC           | ISFETNA         | KAAVA---SP                   | TRVQK--LLD          | TQPH            | FTVA--ALQ  | DRD-----  | ADES     | ALRC     | FN                   | NAFT           | PT          | YTL          | QNR          | TVNL   | FGEGY      | AHQLL      | FARSAD 297 |     |      |             |
| P.falciparum     | NNYFCV         | HYSPED-SVSYVSV       | EVSNLS          | CD---RFL                     | DFMHK               | QLNFY           | NGKYM      | FMIYV     | YVPEE    | NNMS     | KMVP                 | DDNN           | NYSSG       | KSCV         | YQDL         | NKKE   | KEE        | YRLN       | KKLR       | NDL | FINS | KQFYELH 541 |

|                  |                       |                        |      |        |
|------------------|-----------------------|------------------------|------|--------|
| Human            | QQS-----              | 334                    |      |        |
| Drosophila       | GDYL-----             | 347                    |      |        |
| C.elegans        | GQDSSSSDEDDGERSD----- | 368                    |      |        |
| Neurospora       | GGGGARMGEEF-----      | 503                    |      |        |
| Yeast            | -----                 |                        |      |        |
| Dictyostelium    | STNIDLIV-----         | 385                    |      |        |
| Arabidopsis      | SNNSCSSEDEKDEGI-----  | 366                    |      |        |
| Potato           | -----EEKEGKE-----     | 360                    |      |        |
| T.brucei         | GTVGTSAA              | GAKE-----370           |      |        |
| T.cruzi          | VTEK                  | STDSVEE-----370        |      |        |
| L.major          | VEETDA                | AVGGAEPGAKSGPD-----382 |      |        |
| T.brucei prozyme | -----                 |                        |      |        |
| T.cruzi prozyme  | -----                 |                        |      |        |
| L.major prozyme  | -----                 |                        |      |        |
| P.falciparum     | TFTERTV               | GFMRVQYFYVKLRD         | VVKC | VE 570 |
