# Supplementary material
Source: PubMed Central journal article supplement (PMC1895940)

A.

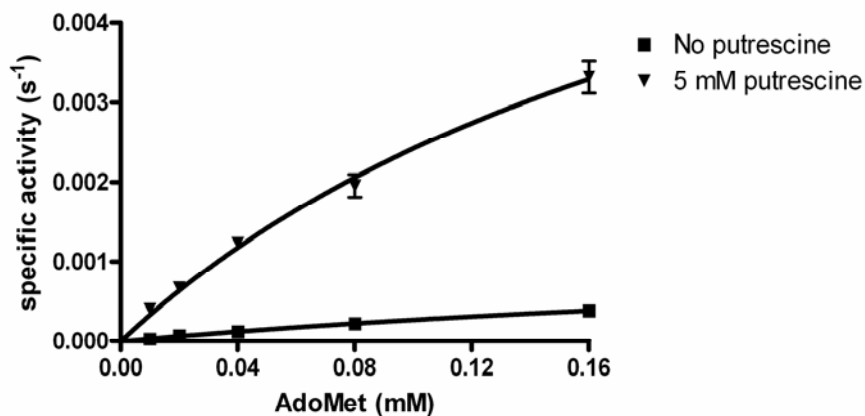

B.

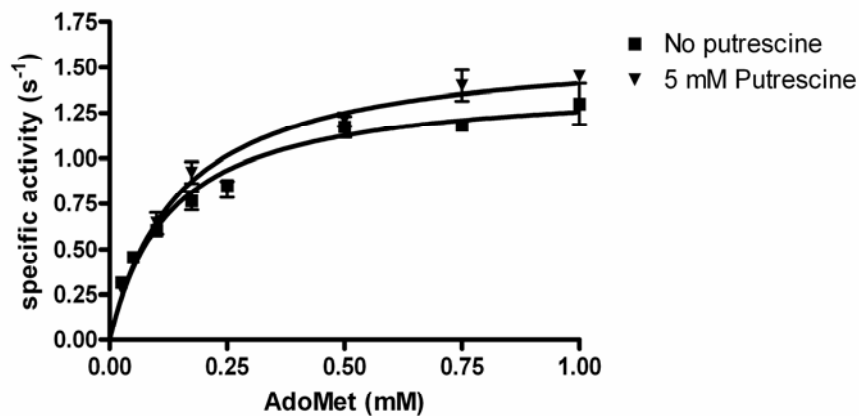

C.

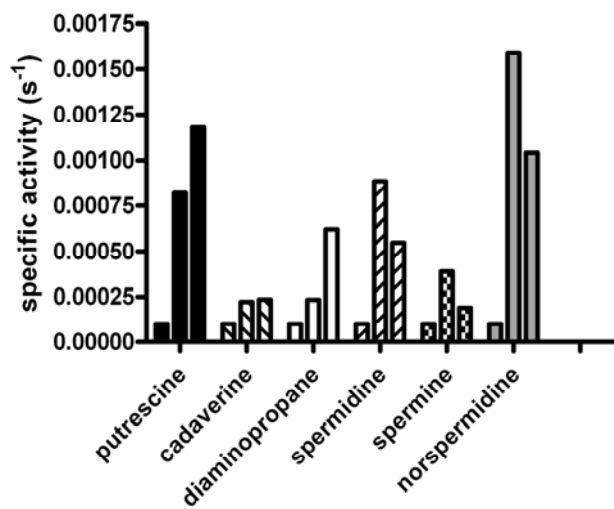

Supplement: pnas_0701111104_3.pdf [file pnas_0701111104_3.pdf]

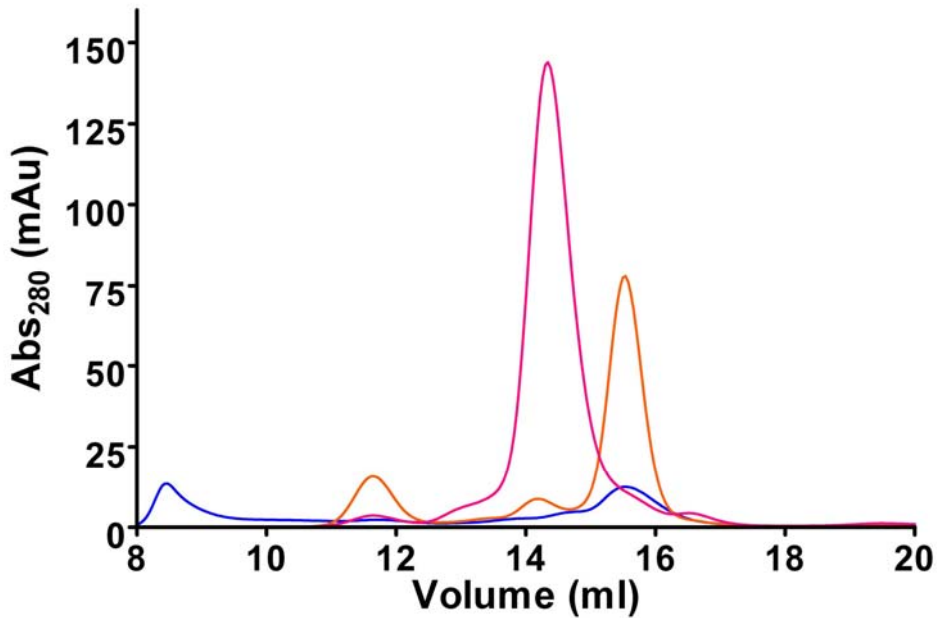

Supplement: pnas_0701111104_4.pdf [file pnas_0701111104_4.pdf]

## Single Species Model

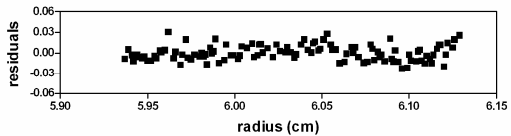

## Homodimer Model

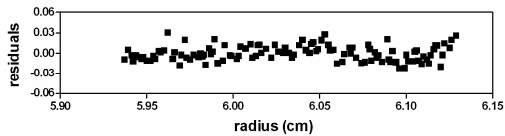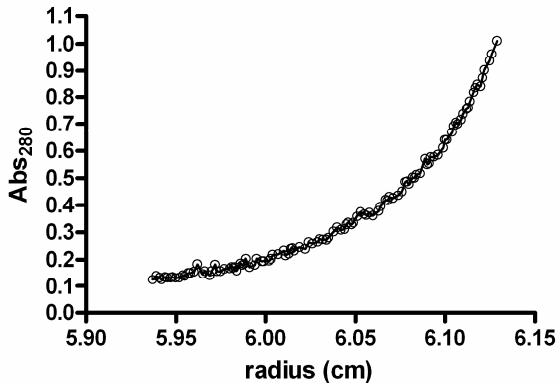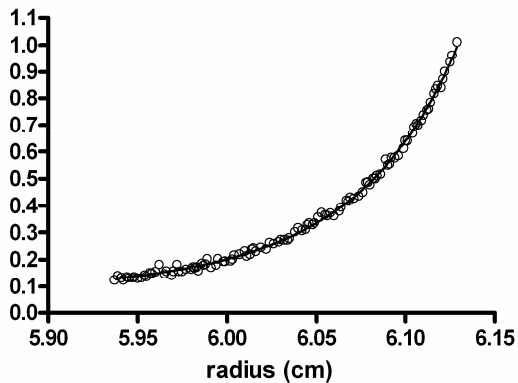

Supplement: pnas_0701111104_5.pdf [file pnas_0701111104_5.pdf]

## Single Species Model

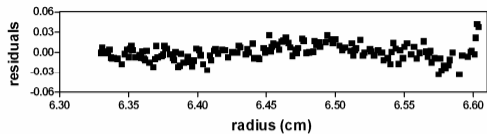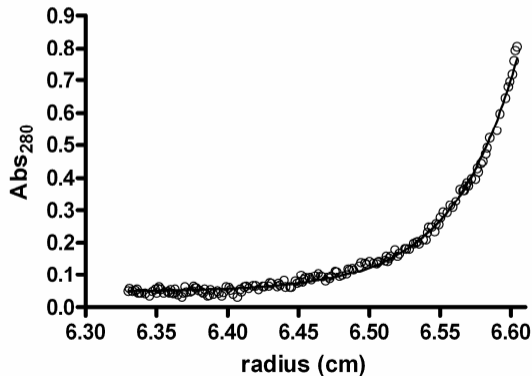

## Homodimer Model

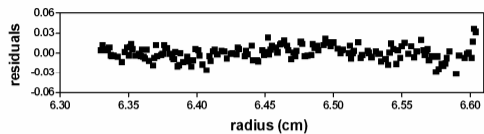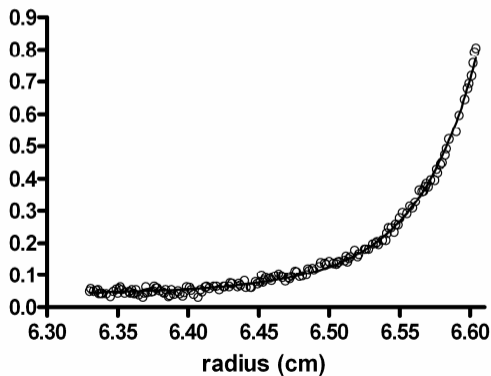

Supplement: pnas_0701111104_6.pdf [file pnas_0701111104_6.pdf]

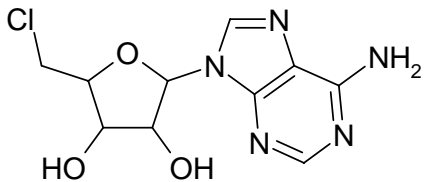

120 C  
2 hrs.

(CH<sub>3</sub>)<sub>2</sub>NH  
MeOH

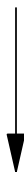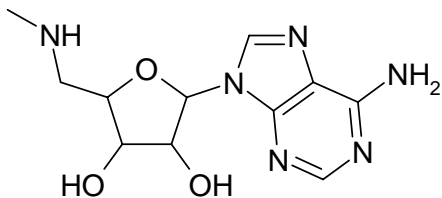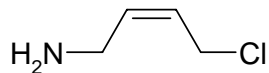

18 hrs.  
r.t.

(BOC)<sub>2</sub>O  
THF

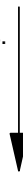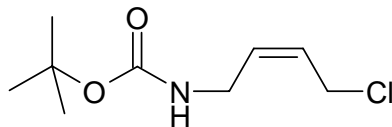

K<sub>2</sub>CO<sub>3</sub>/MeOH  
72 hrs. @ r.t.

HCl (1M)

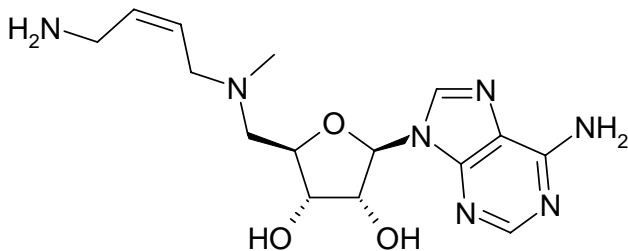

Supplement: pnas_0701111104_7.pdf [file pnas_0701111104_7.pdf]
